# Supplementary material for: Luminescent coordination polymer gels based on rigid terpyridyl phosphine and Ag(i)
Source: Royal Society of Chemistry journal article supplement (doi:10.1039/c2dt00035k), 2012-01-01
Supplement: c2dt00035k.pdf [file c2dt00035k.pdf]

## Supporting information

# Luminescent coordination polymeric gels based on rigid terpyridyl phosphine and Ag(I)

Xin Tan, Xue Chen, Jianyong Zhang,\* and Cheng-Yong Su

*KLGHEI of Environment and Energy Chemistry, School of Chemistry and Chemical Engineering, Sun Yat-Sen University, Guangzhou, 510275, China. E-mail: zhjyong@mail.sysu.edu.cn*

## Experimental

Synthesis of 4'-(4-fluorophenyl)-4,2':6',4''-terpyridine (**Py2F**): 4-Acetylpyridine (0.06 mol, 7.2684 g) was added to a solution of 4-fluorobenzaldehyde (0.03 mol, 3.7233 g) in EtOH (200 mL). KOH pellets (0.06 mol, 4.1056 g) were then added followed by aqueous NH<sub>3</sub> (25%, 5.6 mL, 0.075 mol). The resulting reaction mixture was stirred at RT for 24 h, during which time a white suspension formed. The solid was collected by filtration, washed with EtOH and recrystallised with CHCl<sub>3</sub>-MeOH, affording a white crystalline product (yield 4.52 g, 46%). <sup>1</sup>H NMR (300 MHz, CDCl<sub>3</sub>): δ/ppm 8.75 (d, <sup>3</sup>J<sub>H-H</sub> = 4.7 Hz, 4H), 8.04 (d, <sup>3</sup>J<sub>H-H</sub> = 4.7 Hz, 4H), 7.95 (s, 2H), 7.69 (t, <sup>3</sup>J<sub>H-F</sub> = 7.5 Hz, 2H), 7.22 (d, <sup>3</sup>J<sub>H-H</sub> = 7.6 Hz, 2H). <sup>19</sup>F NMR (282 MHz, CDCl<sub>3</sub>): δ/ppm -111.8.

Synthesis of 4'-(4-diphenylphosphinophenyl)-4,2':6',4''-terpyridine (**Py2Phos**): The reaction was performed under pure dry nitrogen using standard Schlenk techniques. To **Py2F** (1.6368 g, 5 mmol) in THF (100 mL, distilled from potassium under nitrogen prior to use) was added dropwise KPPH<sub>2</sub> (10 mL, 0.5 mol L<sup>-1</sup>, 5 mmol) with stirring. The reaction mixture was brought to reflux for 24 h. THF was removed under reduced pressure and MeOH (10 mL) was added to the residue. The white solid was collected by filtration and washed with MeOH (10 mL × 3). Yield: 1.80 g, 73%. <sup>1</sup>H NMR (300 MHz, CDCl<sub>3</sub>): δ/ppm 8.78 (d, <sup>3</sup>J<sub>H-H</sub> = 6.1 Hz, 4H), 8.07 (d, <sup>3</sup>J<sub>H-H</sub> = 6.1 Hz, 4H), 8.03 (s, 2H), 7.72 (d, <sup>3</sup>J<sub>H-H</sub> = 7.1 Hz, 2H), 7.47 (d, <sup>3</sup>J<sub>H-P</sub> = 7.4 Hz, 2H), 7.37 (m, 10H). <sup>31</sup>P NMR (121.5 MHz, CDCl<sub>3</sub>): δ/ppm 4.5. IR (KBr, cm<sup>-1</sup>): 1592vs, 1556m, 1530w, 1492w, 1475w, 1433m, 1398w, 1386m, 1065w, 995w, 849w, 823s, 747s, 698s, 643s, 628m, 502w. **Py2Phos** is soluble in CHCl<sub>3</sub>, DMF, THF and dioxane, and is slightly soluble in toluene.

Synthesis of gel: Typical procedure: A solution of **Py2Phos** (9.6 mg, 0.0195 mmol) in  $\text{CHCl}_3$  (1 mL) and an AgOTf solution (5.0 mg, 0.0195 mmol) in MeCN (1 mL) were mixed and stirred protected from light for 5 min. After standing for 3 h at RT, a clear transparent gel formed.

Synthesis of  $\text{Ag}(\text{Py2Phos})_2\text{OTf}\cdot x\text{H}_2\text{O}$  (**Ag-OTf**): A solution of **Py2Phos** (5.6 mg, 0.01 mmol) in  $\text{CHCl}_3$  (4 mL) was added to an AgOTf solution (2.6 mg, 0.01 mmol) in MeCN (4 mL). The reaction mixture was stirred protected from light for 5 min, and then heated in a closed container at 50 °C for 72 h. Colourless block crystals were obtained (3.5 mg, yield 50% based on **Py2Phos**). Microanalysis: found (calc.) for  $\text{C}_{67}\text{H}_{48}\text{AgF}_3\text{N}_6\text{O}_3\text{P}_2\text{S}\cdot 3.5\text{H}_2\text{O}$ : C 61.22 (61.60); H 3.804 (4.256); N 6.367 (6.436)%. IR (nujol,  $\text{cm}^{-1}$ ): 1595m, 1531w, 1265s, 1215w, 1146m, 1092w, 1064w, 1025m, 996w, 821s, 745s, 695m, 629m, 532w, 498m.

Synthesis of  $\text{Ag}(\text{Py2Phos})_2\text{BF}_4\cdot\text{H}_2\text{O}$  (**Ag-BF<sub>4</sub>**): A solution of **Py2Phos** (12.7 mg, 0.0257 mmol) in  $\text{CHCl}_3$  (3 mL) was added to an  $\text{AgBF}_4$  solution (2.5 mg, 0.0128 mmol) in MeCN (3 mL). The reaction mixture was stirred protected from light for 5 min, and then heated in a closed container at 80 °C for 24 h. Colourless block crystals were obtained (9.5 mg, yield 63 % based on **Py2Phos**). Microanalysis: found (calc.) for  $\text{C}_{66}\text{H}_{48}\text{AgBF}_4\text{N}_6\text{P}_2\cdot\text{H}_2\text{O}$ : C 65.67 (66.10); H 4.226 (4.214); N 7.115 (7.010)%.

Characterisation: Scanning electron micrographs were recorded on a JSM-6330F Field Emission Scanning Electron Microscope. The samples were prepared by dispersing the gel in EtOH and placing on top of conductive glass stubs, and drying at RT followed by drying in vacuum. Prior to examination the xerogels were coated with a thin layer of gold. Transmission electron micrographs were recorded on a JEOL JEM-2010HR microscope. The samples for TEM were prepared by dispersing the aerogels in  $\text{CHCl}_3$ -EtOH with sonication, and carbon-coated copper grids were placed in for three times. FT-IR spectra of the aerogels were taken in a KBr disc with nujol on a Nicolet/Nexus-670 FT-IR spectrometer in the range of 4000-450  $\text{cm}^{-1}$ . X-ray photoelectron spectroscopy was measured on a Thermo-VG Scientific ESCALAB 250 spectrometer under the pressure  $\sim 2 \times 10^{-9}$  mbar fitted with X-ray monochromatised Al  $\text{K}\alpha$  radiation (15 kV 150 W, spot

size = 500  $\mu\text{m}$ ). Powder X-ray diffraction patterns of the samples were measured on a Rigaku D/MAX 2250 V diffractometer using monochromatized  $\text{CuK}\alpha$  ( $\lambda = 0.15418$  nm) radiation under 40 kV and 100 mA.

X-ray crystallography: Single-crystal X-ray diffraction data were collected on an Oxford Gemini S Ultra diffractometer with Cu  $\text{K}\alpha$  radiation ( $\lambda = 1.54178$  Å) for **Ag-OTf** at 150 K and for **Ag-BF<sub>4</sub>** at 298 K. Both the structures were solved by the direct methods following difference Fourier syntheses and refined by the full-matrix least-squares method on  $F^2$  using the SHELXL-97 software.<sup>1</sup> The non-hydrogen atoms were refined anisotropically, while the hydrogen atoms were introduced in calculated positions and refined by using a riding model. For **Ag-BF<sub>4</sub>**, the solvated water hydrogen atoms were not located. The OTf<sup>-</sup> and BF<sub>4</sub><sup>-</sup> anions were crystallographically disordered over two twofold-axis-related positions with 0.5/0.5 occupancy for **Ag-OTf** and **Ag-BF<sub>4</sub>**, respectively. For **Ag-OTf**, proper restraints were applied to model the OTf<sup>-</sup> anion in normal geometry. For **Ag-BF<sub>4</sub>**, the F atoms were refined isotropically, and appropriate restraints were applied to the large differences in the anisotropic displacement parameters along Ag-P bond.

Crystal data for **Ag-OTf**:  $\text{C}_{67}\text{H}_{48}\text{AgF}_3\text{N}_6\text{O}_3\text{P}_2\text{S}$ ,  $M = 1243.98$ , monoclinic, space group  $C2/c$ ,  $a = 10.0247(2)$ ,  $b = 28.8156(4)$ ,  $c = 20.0865(4)$  Å,  $V = 5647.13(18)$  Å<sup>3</sup>,  $Z = 4$ ,  $T = 150(2)$  K,  $\rho_{\text{calcd}} = 1.463$  g cm<sup>-3</sup>,  $\mu = 4.280$  mm<sup>-1</sup>,  $F(000) = 2544$ , 16501 reflections were collected with 4494 unique for  $3.07 < \theta < 62.51$ ,  $R_{\text{int}} = 0.0393$ ,  $R_1 = 0.0278$ ,  $wR_2 = 0.0676$  ( $I > 2\sigma(I)$ ),  $R_1 = 0.0313$ ,  $wR_2 = 0.0711$  (all data) for 404 parameters, GOF = 1.055. CCDC 854926.

Crystal data for **Ag-BF<sub>4</sub>**:  $\text{C}_{66}\text{H}_{48}\text{AgBF}_4\text{N}_6\text{O}_2\text{P}_2$ ,  $M = 1213.72$ , monoclinic, space group  $C2/c$ ,  $a = 10.2064(2)$ ,  $b = 28.9067(4)$ ,  $c = 20.2929(5)$  Å,  $V = 5761.9(2)$  Å<sup>3</sup>,  $Z = 4$ ,  $T = 298(2)$  K,  $\rho_{\text{calcd}} = 1.399$  g cm<sup>-3</sup>,  $\mu = 3.860$  mm<sup>-1</sup>,  $F(000) = 2480$ , 8220 reflections were collected with 4465 unique for  $3.80 < \theta < 62.53$ ,  $R_{\text{int}} = 0.0323$ ,  $R_1 = 0.0459$ ,  $wR_2 = 0.1201$  ( $I > 2\sigma(I)$ ),  $R_1 = 0.0523$ ,  $wR_2 = 0.1273$  (all data) for 367 parameters, GOF = 1.024. CCDC 854927.

(1) G. M. Sheldrick, *SHELXL 97, Program for Crystal Structure Solution and Refinement*, Göttingen University, Germany, 1997.

**Table S1** Gelation tests of **Py2Phos** and AgOTf (L:Ag = 1:1) in different solvents (0.025 mmol of **Py2Phos** and 0.025 mmol of AgOTf were dissolved in each 1 mL of solvent, and mixed).

| <b>Py2Phos</b>    | AgOTf                           | Result                                                                                           |
|-------------------|---------------------------------|--------------------------------------------------------------------------------------------------|
| CHCl <sub>3</sub> | CH <sub>3</sub> CN              | Transparent to opaque gel after 30 min                                                           |
| CHCl <sub>3</sub> | DMF                             | Transparent gel after 18 h                                                                       |
| THF               | CH <sub>3</sub> CN              | White precipitate (if diluted to 0.0072 mmol L <sup>-1</sup> , transparent gel formed after 2 h) |
| THF               | DMF                             | Transparent gel after 2 d                                                                        |
| CHCl <sub>3</sub> | CH <sub>3</sub> OH              | White precipitate                                                                                |
| THF               | THF                             | White precipitate                                                                                |
| DMF               | DMF                             | Solution, and colourless crystals formed after 5 h                                               |
| DMF               | CH <sub>3</sub> CN              | Solution, and colourless crystals formed after 4 h                                               |
| DMF               | CH <sub>3</sub> NO <sub>2</sub> | Weak gel after 24 h with colourless crystals                                                     |
| Toluene           | CH <sub>3</sub> CN              | White precipitate                                                                                |
| Dioxane           | CH <sub>3</sub> CN              | White suspension                                                                                 |

**Table S2** Response of the gel towards various anions (0.0125 mmol of salt in 0.5 mL of CHCl<sub>3</sub> was topped on 0.0125 mmol of the gel, and standing at RT).

| Salt                                   | Result                                                                                         |
|----------------------------------------|------------------------------------------------------------------------------------------------|
| [Bu <sub>4</sub> N][OTf]               | No immediate change, and crystals formed standing for overnight                                |
| [Me <sub>4</sub> N][NO <sub>3</sub> ]  | No immediate change, and crystals formed standing for overnight                                |
| [Bu <sub>4</sub> N][PF <sub>6</sub> ]  | No immediate change, and crystals formed after standing for 2 d                                |
| [Bu <sub>4</sub> N][BF <sub>4</sub> ]  | No immediate change, and crystals formed after standing for 2 d                                |
| [Bu <sub>4</sub> N][ClO <sub>4</sub> ] | No immediate change, and crystals formed after standing for 2 d                                |
| [Bu <sub>4</sub> N]Br                  | Dissolved immediately to form clear solution, and crystals formed after standing for overnight |
| [Bu <sub>4</sub> N]Cl                  | Dissolved immediately to form clear solution, and crystals formed after standing for overnight |
| [Bu <sub>4</sub> N]OAc                 | Dissolved immediately, and crystals formed after standing for 2 d                              |

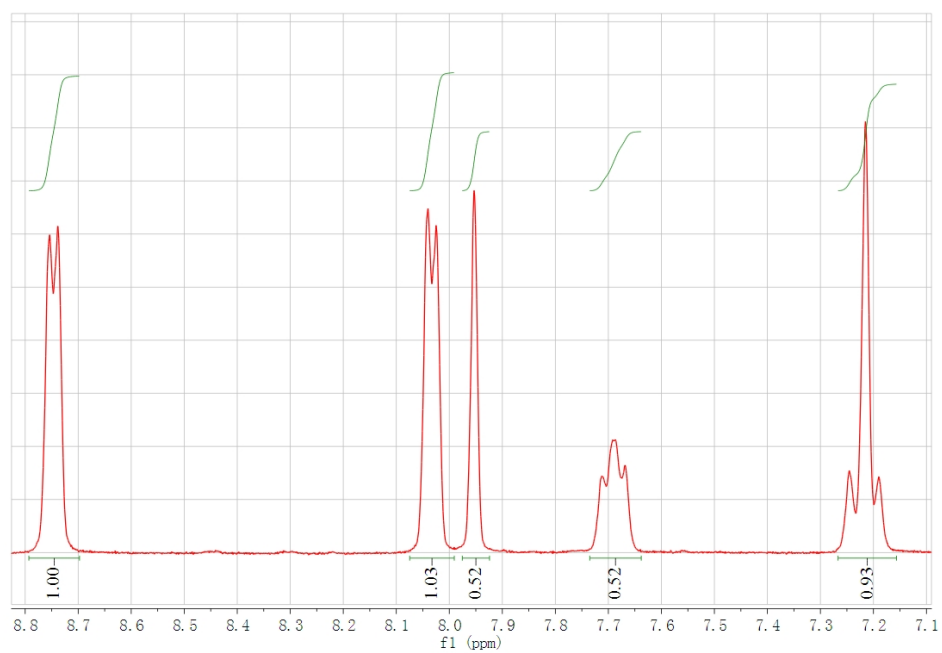

**Fig. S1**  $^1\text{H}$  NMR (300 MHz) of Py2F in  $\text{CDCl}_3$  at 300 K.

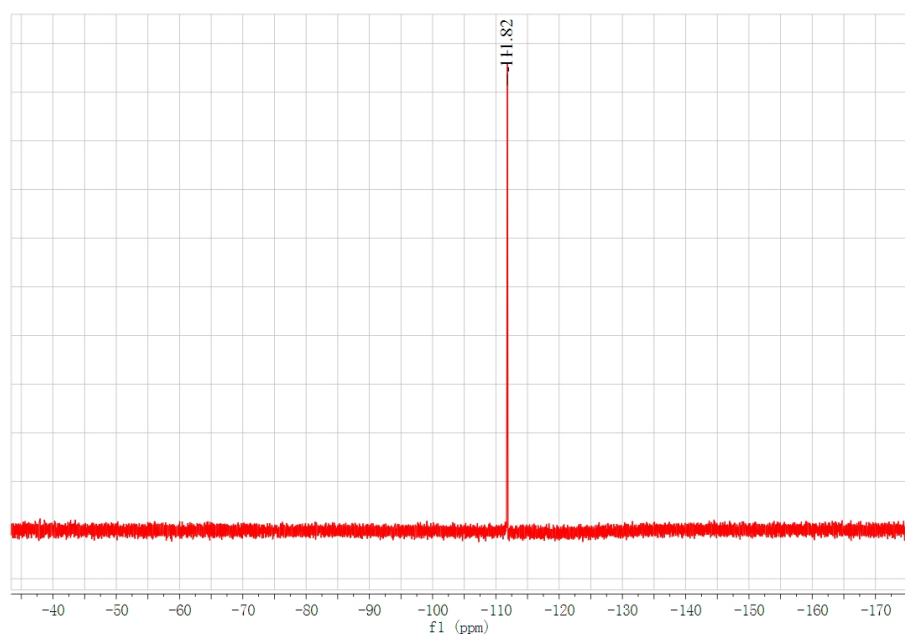

**Fig. S2**  $^{19}\text{F}$  NMR (282.3 MHz) of Py2F in  $\text{CDCl}_3$  at 300 K.

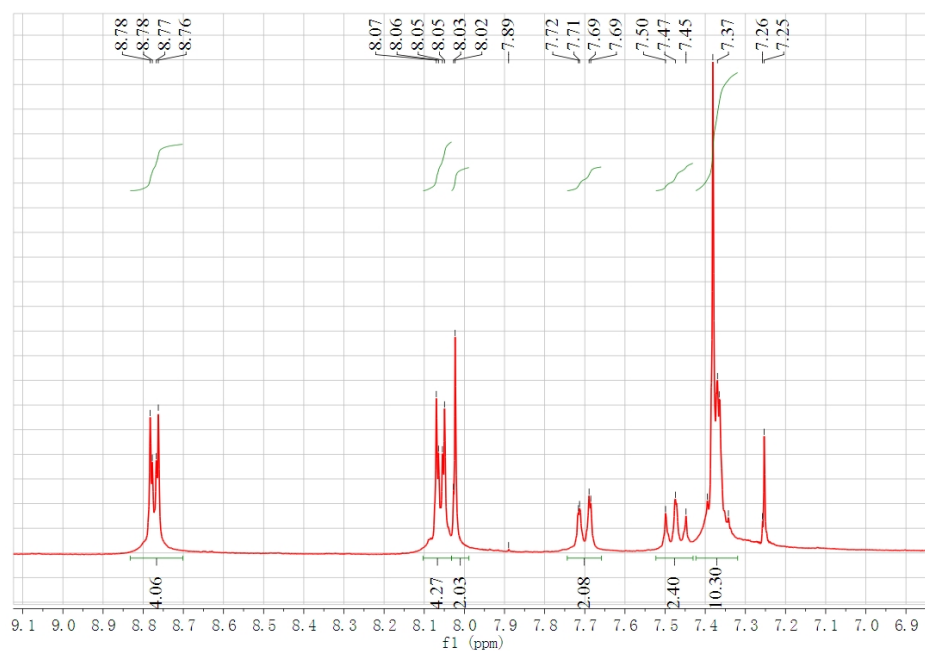

**Fig. S3**  $^1\text{H}$  NMR (300 MHz) of **Py2Phos** in  $\text{CDCl}_3$  at 300 K.

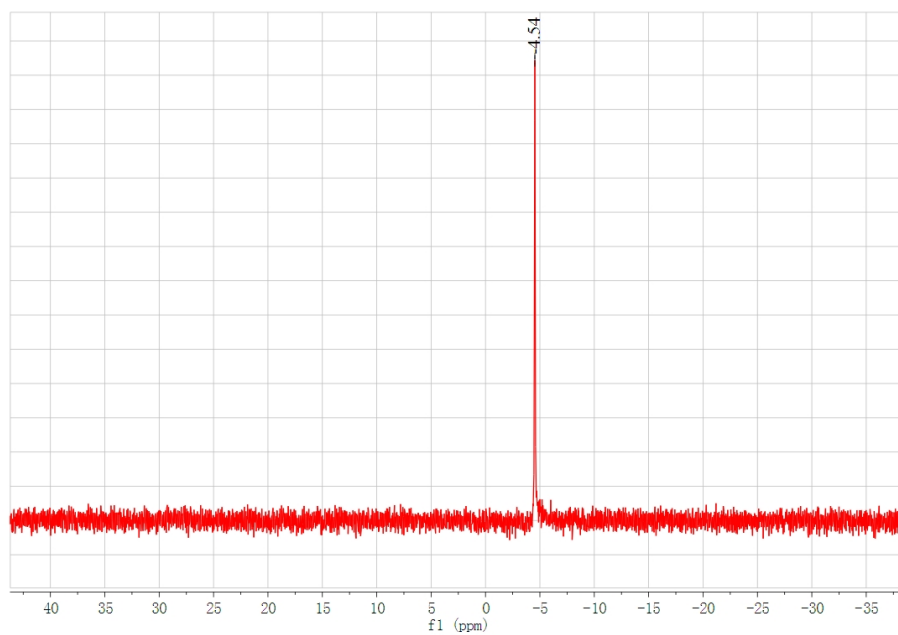

**Fig. S4**  $^{31}\text{P}\{^1\text{H}\}$  NMR (121.5 MHz) of **Py2Phos** in  $\text{CDCl}_3$  at 300 K.

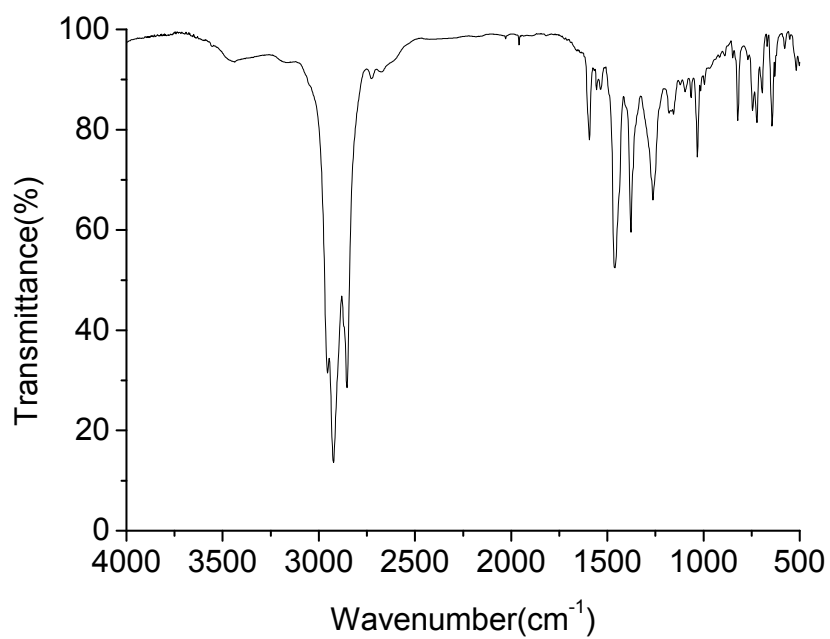

**Fig. S5** FT-IR spectrum (KBr) of **Py2Phos**.

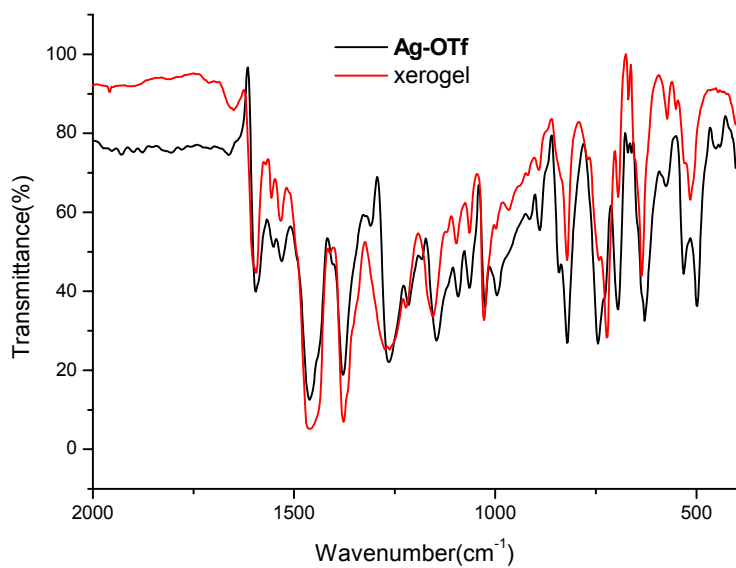

**Fig. S6** FT-IR spectra of **Ag-OTf** and the **AgOTf/Py2Phos = 1:1** xerogel in nujol.

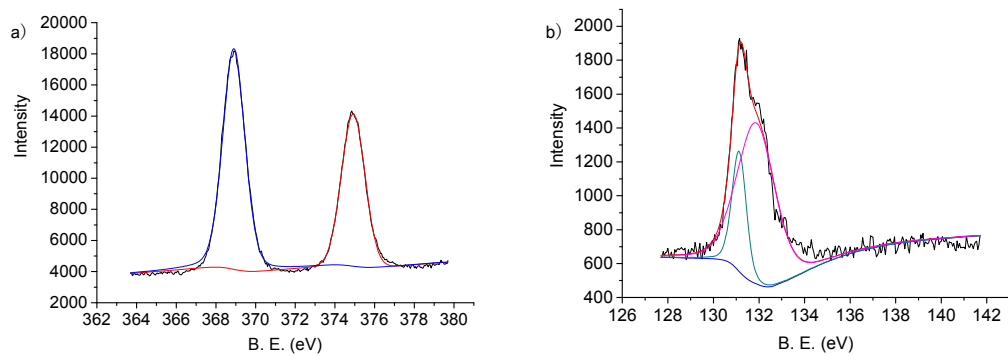

**Fig. S7** XPS Ag 3d (a) and P 2p (b) spectra and the deconvoluted spectra for the xerogel.

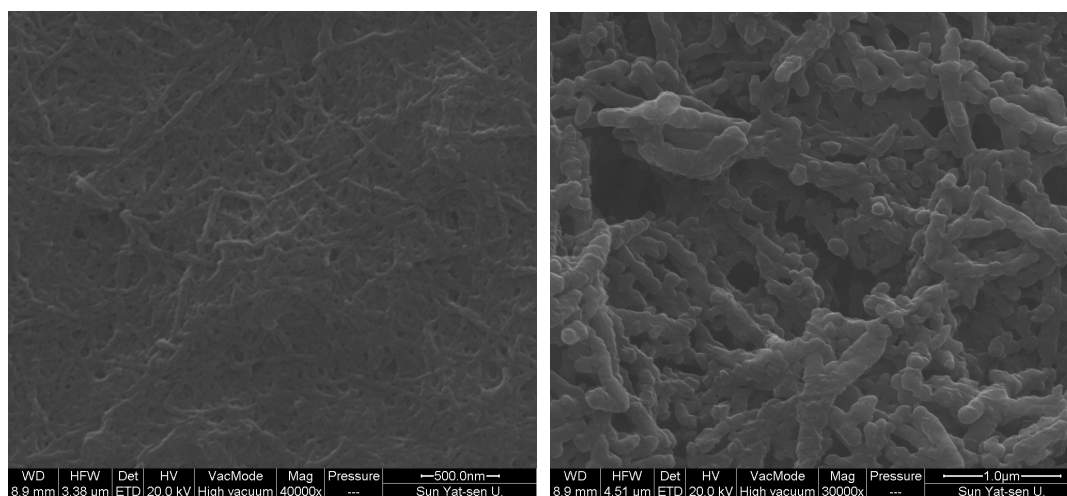

**Fig. S8** SEM images of the CHCl<sub>3</sub>-MeCN xerogel.

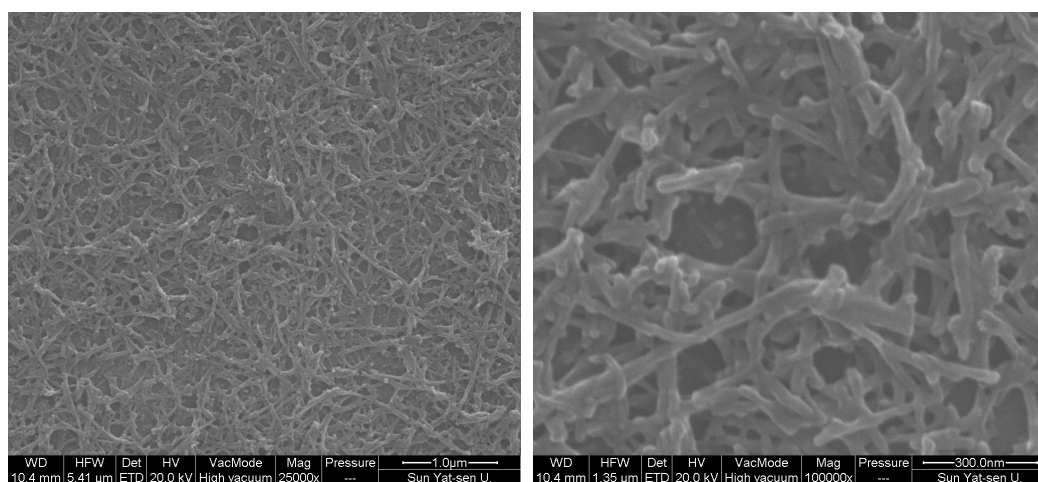

**Fig. S9** SEM images of the CHCl<sub>3</sub>-MeCN xerogel after solvent exchange with toluene.



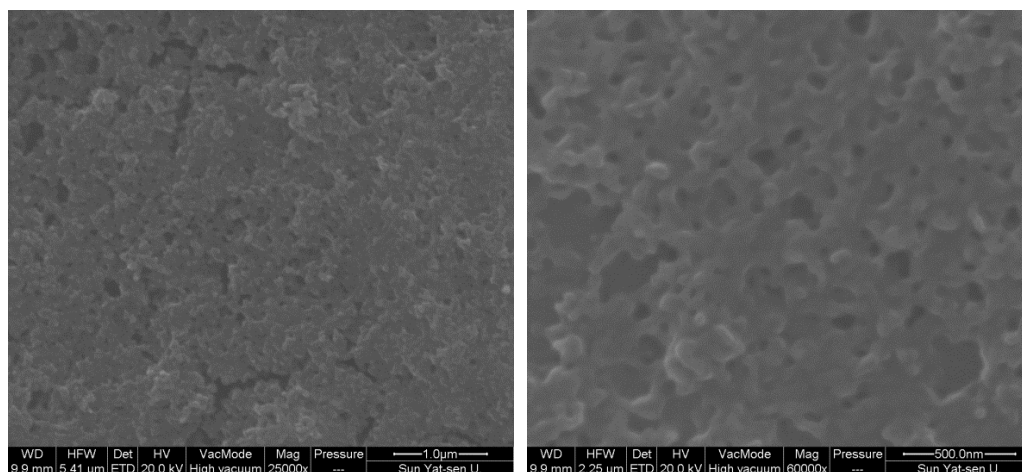

**Fig. S10** SEM images of the THF-DMF xerogel.

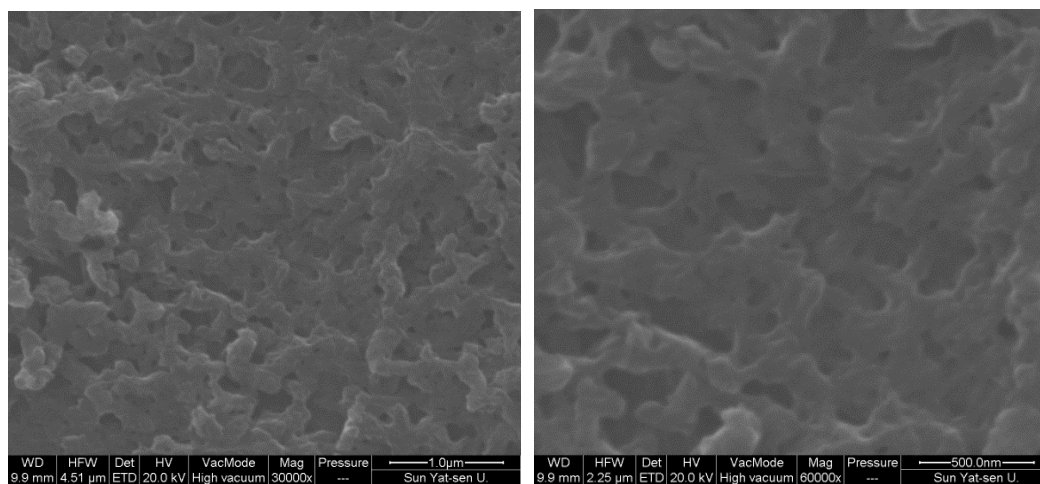

**Fig. S11** SEM images of the CHCl<sub>3</sub>-DMF xerogel.

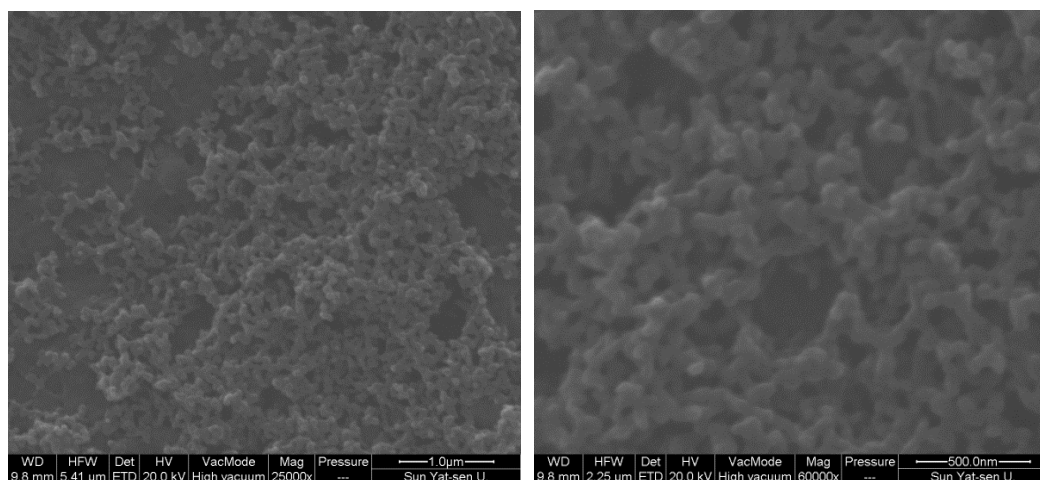

**Fig. S12** SEM images of the THF-MeCN xerogel.

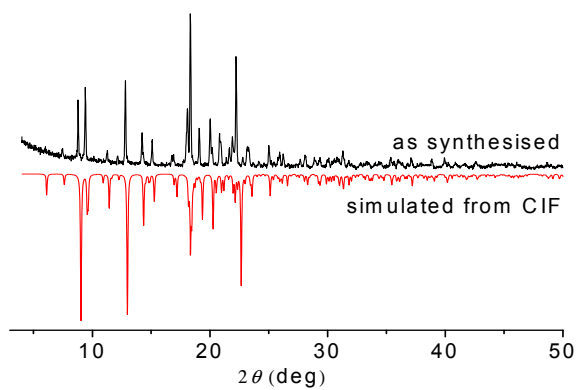

**Fig. S13** Simulated and measured powder XRD patterns of **Ag-OTf**.

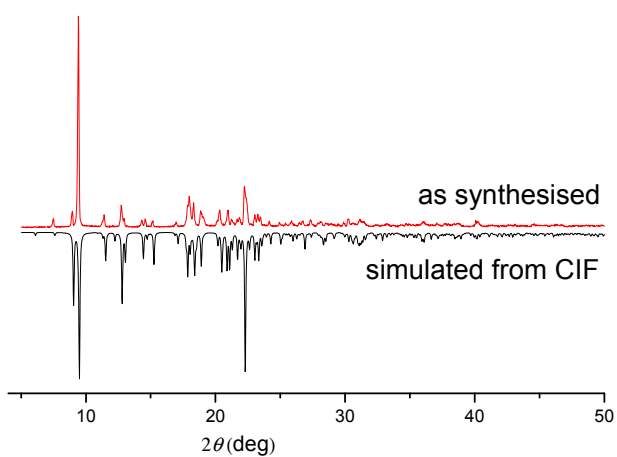

**Fig. S14** Simulated and measured powder XRD patterns of **Ag-BF<sub>4</sub>**.

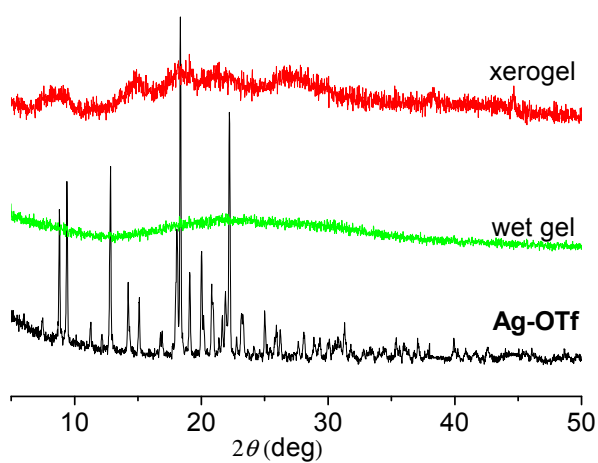

**Fig. S15** Measured powder XRD patterns of the **AgOTf/L = 1:1** wet gel, the xerogel and **Ag-OTf**.

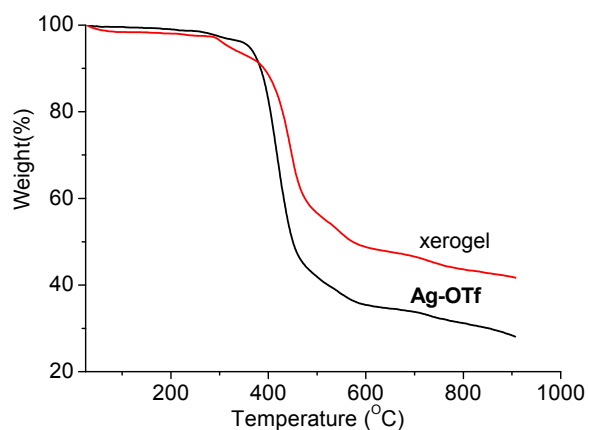

**Fig. S16** TGA curves of the AgOTf/L = 1:1 xerogel and **Ag-OTf**.

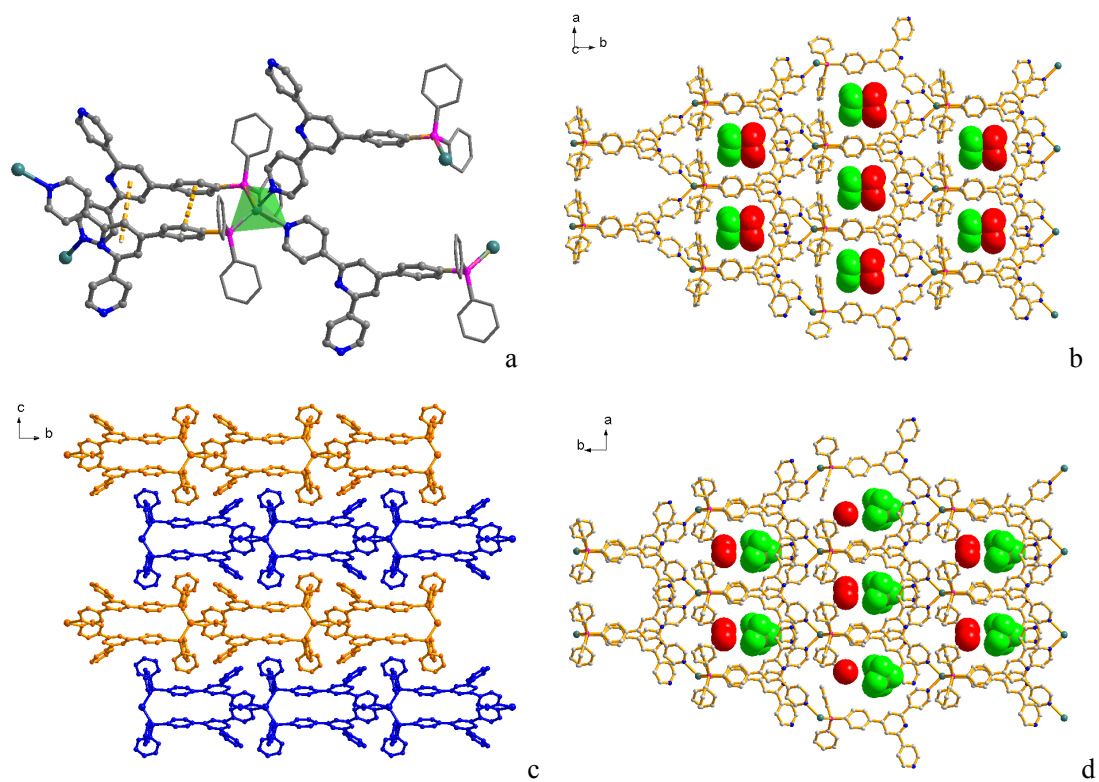

**Fig. S17** X-ray structures, a) intralayer  $\pi$ - $\pi$  interactions, b) OTf<sup>-</sup> anions residing in the (4,4) grid cavities, c) the (4,4) networks packing in a ABAB pattern of **Ag-OTf**, and d) BF<sub>4</sub><sup>-</sup> anions and solvated water residing in the (4,4) grid cavities of **Ag-BF<sub>4</sub>**.

**Table S3.** Selected bond lengths (Å) and angles (°) for **Ag-OTf** and **Ag-BF<sub>4</sub>**.

| <b>Ag-OTf</b>                           |            | <b>Ag-BF<sub>4</sub></b>                |           |
|-----------------------------------------|------------|-----------------------------------------|-----------|
| Ag1—N1 <sup>i</sup>                     | 2.3870(19) | Ag1—N1 <sup>i</sup>                     | 2.411(3)  |
| Ag1—N1 <sup>ii</sup>                    | 2.3870(19) | Ag1—N1 <sup>ii</sup>                    | 2.411(3)  |
| Ag1—P1                                  | 2.4667(6)  | Ag1—P1                                  | 2.4866(9) |
| Ag1—P1 <sup>iii</sup>                   | 2.4667(6)  | Ag1—P1 <sup>iii</sup>                   | 2.4866(9) |
| N1 <sup>i</sup> —Ag1—N1 <sup>ii</sup>   | 90.47(10)  | N1 <sup>i</sup> —Ag1—N1 <sup>ii</sup>   | 88.77(16) |
| N1 <sup>i</sup> —Ag1—P1                 | 111.11(5)  | N1 <sup>i</sup> —Ag1—P1 <sup>iii</sup>  | 112.76(9) |
| N1 <sup>ii</sup> —Ag1—P1                | 111.72(5)  | N1 <sup>ii</sup> —Ag1—P1                | 112.76(9) |
| N1 <sup>i</sup> —Ag1—P1 <sup>iii</sup>  | 111.72(5)  | N1 <sup>i</sup> —Ag1—P1                 | 109.89(8) |
| N1 <sup>ii</sup> —Ag1—P1 <sup>iii</sup> | 111.11(5)  | N1 <sup>ii</sup> —Ag1—P1 <sup>iii</sup> | 109.89(8) |
| P1—Ag1—P1 <sup>iii</sup>                | 117.53(3)  | P1—Ag1—P1 <sup>iii</sup>                | 118.85(4) |

Symmetry codes for **Ag-BF<sub>4</sub>**: (i) -0.5+x, -0.5+y, z; (ii) 1.5-x, -0.5+y, 1.5-z; (iii) 1-x, y, 1.5-z.

Symmetry codes for **Ag-OTf**: (i) 2.5-x, 0.5+y, 1.5-z; (ii) -0.5+x, 0.5+y, z; (iii) 2-x, y, 1.5-z.
